# Supplementary material
Source: Springer Nature journal article supplement (https://www.springermedizin.de/resource/supplementary/13063_2011_1078_MOESM1_ESM.pdf/9619280)
Supplement: MOESM1 [file 9619280]

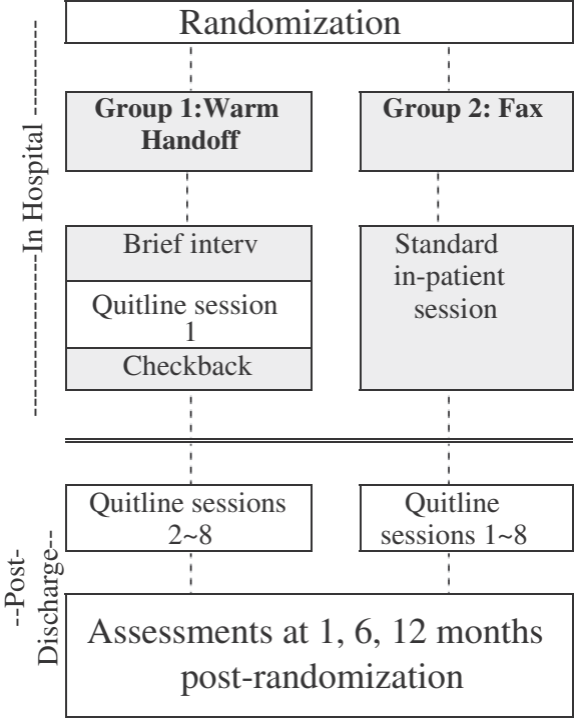

Randomization

**Group 1: Warm Handoff**

**Group 2: Fax**

Brief interv

Quitline session  
1

Checkback

Standard  
in-patient  
session

Quitline sessions  
2~8

Quitline  
sessions 1~8

Assessments at 1, 6, 12 months  
post-randomization

In Hospital

Post-Discharge
